# Supplementary material
Source: Springer Nature journal article supplement (https://www.springermedizin.de/resource/supplementary/12986_2007_114_MOESM3_ESM.pdf/25655390)

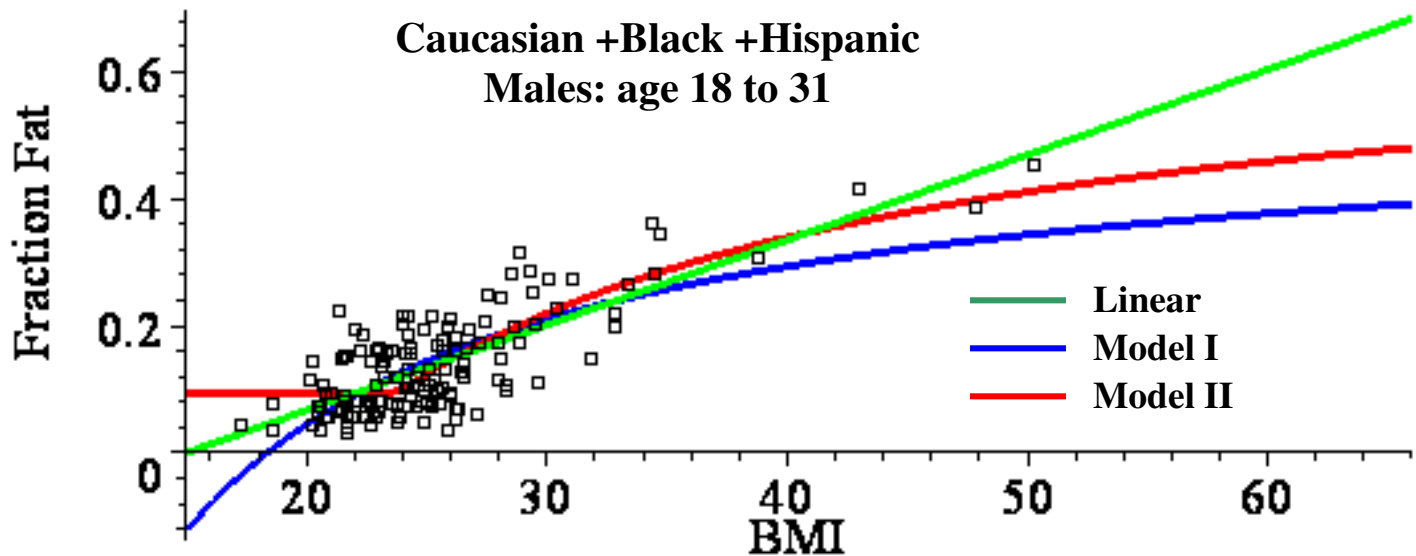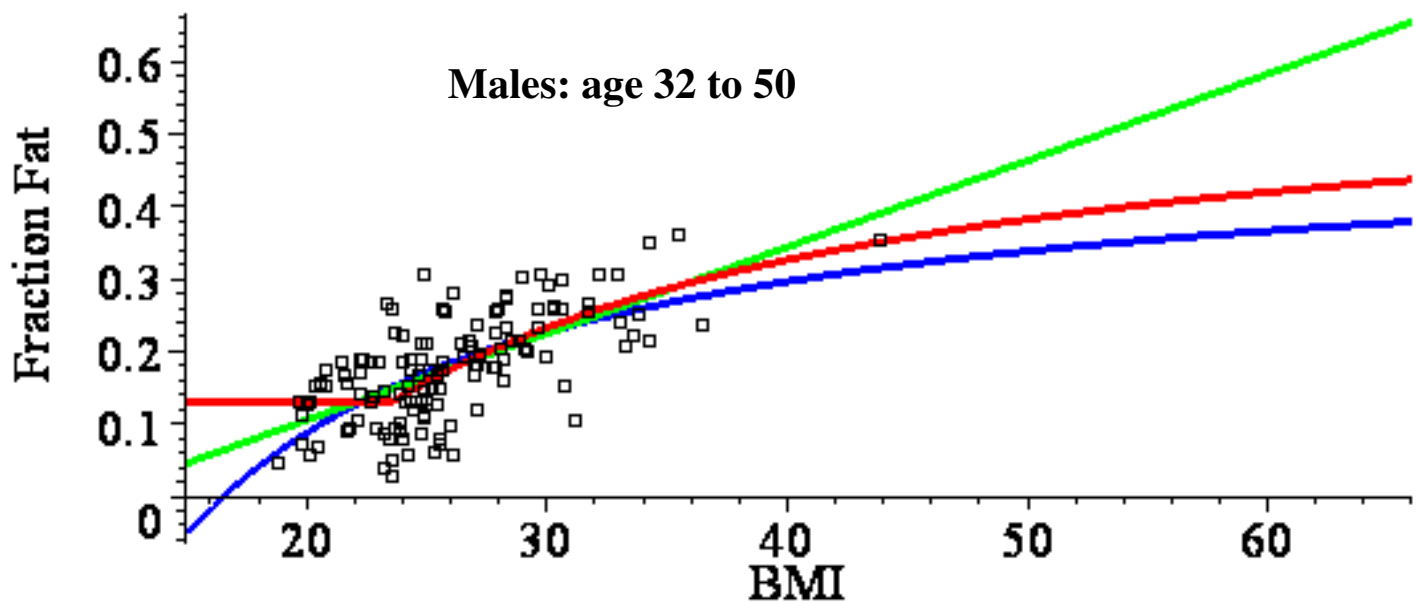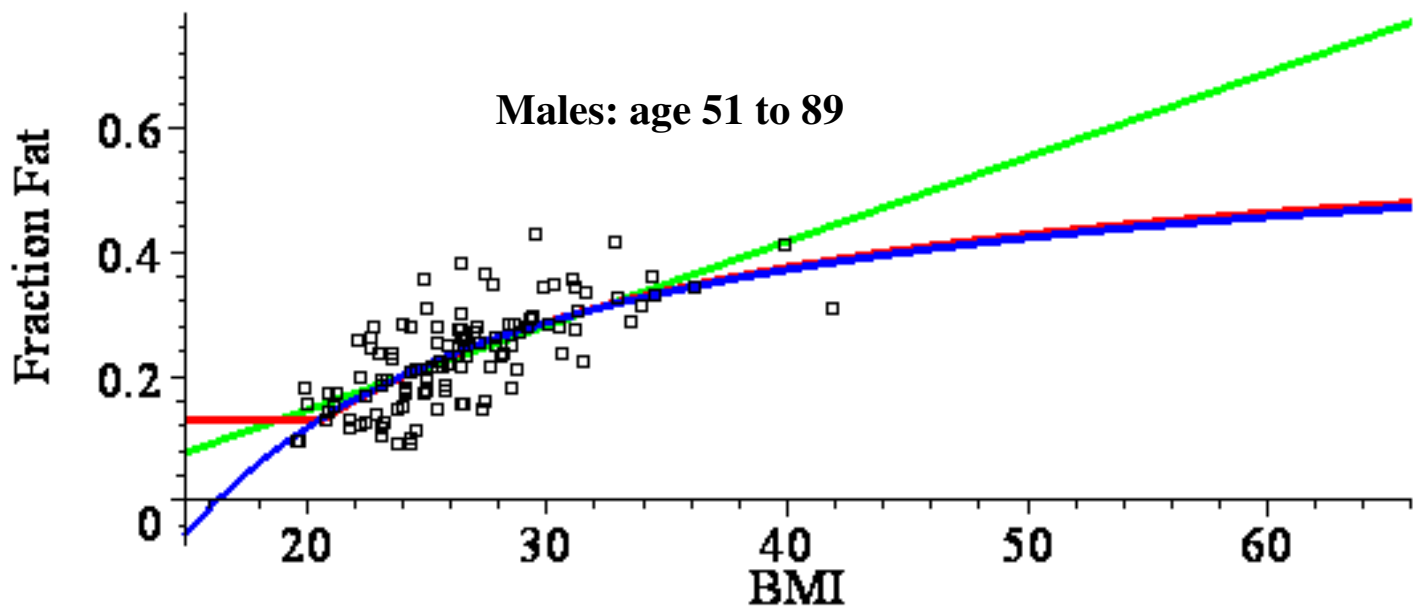

Supplement: MOESM3 [file 25655390]
